# Supplementary material
Source: HighWire-hosted journal article supplement (http://www.cmaj.ca/highwire/filestream/69618/field_highwire_adjunct_files/2/170676-res-3-at.pdf)
Supplement: 170676-res-3-at.pdf [file 170676-res-3-at.pdf]

### Appendix 3 (as supplied by the authors): Sensitivity analyses

#### Part 1. Sensitivity analysis UPC identified as pediatrician when $\geq 2$ visits with pediatrician\*

| Covariate                              | DKA<br>Crude proportion |      | adjusted RR (95% CI) ** |
|----------------------------------------|-------------------------|------|-------------------------|
|                                        | N                       | %    |                         |
| Usual Provider of Care (by age group)  |                         |      |                         |
| 1-4 y.o.                               | 666                     | 28.5 |                         |
| None                                   | 114                     | 29.0 | 1.00                    |
| Family Physician                       | 333                     | 29.4 | 1.02 (0.73, 1.41)       |
| Pediatrician                           | 219                     | 26.9 | 0.93 (0.65, 1.34)       |
| 5-11 y.o.                              | 1403                    | 32.0 |                         |
| None                                   | 589                     | 35.0 | 1.00                    |
| Family Physician                       | 500                     | 29.2 | 0.84 (0.71, 1.00)       |
| Pediatrician                           | 314                     | 30.9 | 0.89 (0.72, 1.08)       |
| 12-17 y.o.                             | 1635                    | 21.8 |                         |
| None                                   | 824                     | 26.1 | 1.00                    |
| Family Physician                       | 590                     | 18.1 | 0.70 (0.57, 0.86)       |
| Pediatrician                           | 221                     | 15.8 | 0.61 (0.44, 0.84)       |
| Sex                                    |                         |      |                         |
| Female                                 | 464                     | 26.4 | 1.00                    |
| Male                                   | 532                     | 27.4 | 1.02 (0.92, 1.14)       |
| SES (Social and material deprivation)  |                         |      |                         |
| Least deprived                         | 390                     | 25.3 | 1.00                    |
| Moderately deprived                    | 198                     | 27.2 | 1.10 (0.95, 1.27)       |
| Most deprived                          | 376                     | 28.6 | 1.14 (1.00, 1.28)       |
| Rurality                               |                         |      |                         |
| Urban (including population > 100,000) | 651                     | 26.7 | 1.00                    |
| Small Cities 10,000-100,000            | 149                     | 31.2 | 1.16 (1.00, 1.35)       |
| Rural (<10, 000)                       | 191                     | 24.6 | 0.88 (0.77, 1.02)       |

Appendix to: Nakhla M, Rahme E, Simard M, et al. Risk of ketoacidosis in children at the time of diabetes mellitus diagnosis by primary caregiver status: a population-based retrospective cohort study. *CMAJ* 2018. DOI:10.1503/cmaj.170676. Copyright © 2018 The Author(s) or their employer(s).

To receive this resource in an accessible format, please contact us at [cmajgroup@cmaj.ca](mailto:cmajgroup@cmaj.ca).

Note: CI= confidence interval, RR=relative risk

\* Sensitivity analysis of UPC identified as family physician when  $\geq 2$  visits with FMG or family physician yielded similar results as seen in Table B

\*\* Adjusted for UPC, age group, UPC\*age group (interaction term), sex, SES, rurality

**Part 2. Sensitivity analysis for an exposure period up to 1 day of index date\***

| Covariate                             | DKA<br>Crude proportion |      | adjusted RR (95% CI) ** |
|---------------------------------------|-------------------------|------|-------------------------|
|                                       | N                       | %    |                         |
| Usual Provider of Care (by age group) |                         |      |                         |
| 1-4 y.o.                              | 666                     | 28.5 |                         |
| None                                  | 112                     | 28.6 | 1.00                    |
| Family Physician                      | 339                     | 29.5 | 1.03 (0.74, 1.44)       |
| Pediatrician                          | 215                     | 27.0 | 0.95 (0.66, 1.36)       |
| 5-11 y.o.                             | 1403                    | 32.0 |                         |
| None                                  | 577                     | 34.5 | 1.00                    |
| Family Physician                      | 513                     | 29.6 | 0.87 (0.73, 1.44)       |
| Pediatrician                          | 313                     | 31.3 | 0.91 (0.74, 1.11)       |
| 12-17 y.o.                            | 1635                    | 21.8 |                         |
| None                                  | 805                     | 26.1 | 1.00                    |
| Family Physician                      | 611                     | 18.3 | 0.71 (0.58, 0.87)       |
| Pediatrician                          | 219                     | 16.0 | 0.61 (0.44, 0.85)       |
| Gender                                |                         |      |                         |
| Female                                | 464                     | 26.4 | 1.00                    |
| Male                                  | 532                     | 27.4 | 1.02 (0.92, 1.14)       |
| SES (Social and material deprivation) |                         |      |                         |
| Least deprived                        | 390                     | 25.3 | 1.00                    |
| Moderately deprived                   | 198                     | 27.2 | 1.10 (0.95, 1.27)       |
| Most deprived                         | 376                     | 28.6 | 1.14 (1.01, 1.28)       |

|                                        |     |      |                   |
|----------------------------------------|-----|------|-------------------|
| <b>Rurality</b>                        |     |      |                   |
| Urban (including population > 100,000) | 651 | 26.7 | 1.00              |
| Small Cities 10,000-100,000            | 149 | 31.2 | 1.16 (1.00, 1.35) |
| Rural (<10, 000)                       | 191 | 24.6 | 0.89 (0.77, 1.02) |

Note: CI= confidence interval, RR=relative risk

\* Sensitivity analysis of exposure period up to 14 days and 30 days of index date yielded similar results as seen in Table C

\*\* Adjusted for UPC, age group, UPC\*age group (interaction term), sex, SES, rurality
